# Supplementary material for: Effects of Targeted Temperature Management in Patients with Post-Cardiac Arrest Syndrome after an Out-Of-Hospital Cardiac Arrest Caused by Hanging: A Prospective Observational Cohort Study in Japan
Source: Research Square preprint supplement (doi:10.21203/rs.3.rs-1120328/v1), 2021-12-15
Supplement: Supplementary file 1 [file 8b758b713b077ef886cae2db.xlsx]

## Sheet: Sheet1
Table 1. Baseline characteristics of post-cardiac arrest syndrome patients in the original cohort and propensity score-matched cohort.
	Original					Propensity score matched
	non-TTM group n=156	TTM group n=43	p	Standard mean difference		non-TTM group n=34	TTM group n=34	p	Standard mean difference
Age, yr	50 (12, 96)	41 (3, 85)	0.002	0.551		44 (16, 84)	42 (3, 85)	0.329	0.215
Male gender, n(%)	79 (50.6%)	23 (53.5%)	0.863	0.057		18 (52.9%)	17 (50.0%)	1	0.059
Pre-hospital variables
Bystander-CRP, n(%)	94 (60.3%)	30 (69.8%)	0.29	0.2		20 (58.8%)	23 (67.6%)	0.615	0.184
Initial rhythm at the scene, n(%)
shockable	4 (2.6%)	0	0.579	0.229		0	0	NA
PEA	34 (21.8%)	11 (25.6%)	0.681	0.089		8 (23.5%)	7 (20.6%)	1	0.071
Asystole	111 (71.2%)	29 (67.4%)	0.707	0.081		23 (67.6%)	24 (70.6%)	1	0.064
ROSC	7 (4.5%)	3 (7.0%)	0.455	0.106		3 (8.8%)	3 (8.8%)	1	0
Definitive airway insertion, n(%)	83 (53.2%)	21(48.8%)	0.731	0.087		14 (41.2%)	14 (41.2%)	1	0
Venous access, n(%)	78 (50.0%)	25 (58.1%)	0.391	0.164		18 (52.9%)	18 (52.9%)	1	0
Adrenaline administration, n(%)	62 (39.7%)	17 (39.5%)	1	0.004		16 (47.1%)	14 (41.2%)	0.807	0.119
ROSC during transportation, n(%)	54 (34.6%)	21 (48.8%)	0.11	0.291		15 (44.1%)	15 (44.1%)	1	0
Time to ROSC from emergency call, min	33 (0, 106)	24 (0, 54)	<0.001	0.828		24 (0, 54)	26 (3, 54)	0.417	0.068
In-hospital variables
Cardiac rhythm on arrival, n(%)
shockable	1 (0.6%)	0	1	0.114		0	0	NA
PEA	44 (28.2%)	11 (25.6%)	0.848	0.059		8 (23.5%)	8 (23.5%)	1	0
Asystole	55 (35.3%)	13 (30.2%)	0.59	0.107		12 (35.3%)	11 (32.4%)	1	0.062
ROSC	56 (35.9%)	19 (44.2%)	0.375	0.17		14 (41.2%)	15 (44.1%)	1	0.059
Glasgow coma scale	3 (3, 13)	3 (3, 7)	0.022	0.156		3 (3, 13)	3 (3, 7)	0.454	0.099
Body temperature, ℃	35.8 (26.3, 38.4)	36.1 (34.1, 37.6)	0.003	0.516		36.2 (33.9, 37.0)	36.1 (34.1, 37.6)	0.367	0.269
Adrenaline administration after arrival, n(%)	101 (64.7%)	22 (51.2%)	0.114	0.278		17 (50.0%)	17 (50.0%)	1	0
Intubation after arrival, n(%)	148 (94.9%)	41 (95.3%)	1	0.022		30 (88.2%)	33 (97.1%)	0.356	0.343
Arterial blood gas analysis
pH	6.86 (6.59, 7.44)	6.96 (6.53, 7.48)	0.043	0.389		6.89 (6.62, 7.44)	6.85 (6.53, 7.48)	0.773	0.016
PaCO2, mmHg	90.3 (29.3, 174.7)	76.6 (22.5, 160.0)	0.022	0.352		83.3 (38.3, 174,7)	82.2 (22.5, 160.0)	0.985	0.016
Base excess, mmol/L	-19.6 (-33.7, 26.1)	-15.9 (-30.0, -5.0)	0.007	0.551		-19.5 (-33.7, 26.1)	-16.8 (-30.0, -5.3)	0.512	0.059
Lactate, mmol/L	13.5 (1.0, 22.0)	12.0 (0.5, 20.0)	0.151	0.213		13.7 (1.0, 22.0)	12.9 (5.9, 20.0)	0.792	0.048
CPR, cardiopulmonary resuscitation; PEA, pulseless electrical activity; ROSC, return of spontaneous circulation; PaCO2, partial pressure of carbon dioxide.
